# Supplementary material
Source: PubMed Central journal article supplement (PMC5583500)
Supplement: AEM.01313-17_zam999118056s1.pdf [file AEM.01313-17_zam999118056s1.pdf]

Supplementary Table 1: Mutations observed in resequenced isolates. All nucleotide references are relative to AG978 (BW25113 *ompT::pcaHGBDC pflB::pcaIJFK*)

| Strain | Nucleotide Mutation              | Notes                                                                    |
|--------|----------------------------------|--------------------------------------------------------------------------|
| JME1   | Deletion, 266,713-365,993        | Contains <i>lacI</i> , <i>mhpABC</i>                                     |
|        | Duplication, 570,874-689,163     | Contains <i>pcaHGBDC</i><br>IS5 flanks each side of duplication          |
|        | Duplication, 2,065,704-2,105,550 | Contains <i>flu</i><br>IS5 flanks each side of duplication               |
|        | G2,076,174T                      | Ag43 G684C, in both copies of <i>flu</i>                                 |
|        | C2,853,953T                      | Intergenic                                                               |
|        | Deletion, 2,971,431-2,971,442    | In-frame deletion of 12 bp in <i>ptsP</i>                                |
|        | Duplication, 3,624,082-3,767,566 | Spans <i>rhsB</i> to <i>rhsA</i> , frequently duplicated                 |
|        | Deletion, 4,409,630-4,409,639    | 10 bp frameshift mutation in <i>rnr</i>                                  |
| JME2   | Deletion, 266,713-365,993        | Contains <i>lacI</i> , <i>mhpABC</i>                                     |
|        | Duplication, 570,874-689,163     | Contains <i>pcaHGBDC</i><br>IS5 flanks each side of duplication          |
|        | Deletion, 1,198,056-1,213,105    | Prophage excision                                                        |
|        | T1,311,771G                      | TopA M533R                                                               |
|        | Deletion, 2,967,196-2,967,197    | 2 bp frameshift mutation in <i>ptsP</i>                                  |
|        | Deletion, 4,409,630-4,409,639    | 10 bp frameshift mutation in <i>rnr</i>                                  |
| JME3   | Duplication, 570,874-689,163     | Contains <i>pcaHGBDC</i><br>IS5 flanks each side of duplication          |
|        | Duplication, 3,624,082-3,767,566 | Spans <i>rhsB</i> to <i>rhsA</i> , frequently duplicated                 |
|        | Duplication, 3,940,660-4,034,652 |                                                                          |
|        | T3,991,518A                      | CyaA W1072R                                                              |
|        | C4,174,713A                      | SecE A29E                                                                |
| JME4   | T580,465G                        | <i>pcaH</i> RBS<br>See Supplementary Figure 1                            |
|        | Deletion, 1,198,056-1,213,105    | Prophage excision                                                        |
|        | C2,072,530T                      | Silent mutation in Ag43                                                  |
|        | Deletion, 2,072,288-2,072,443    | In-frame 156 bp deletion in <i>flu</i>                                   |
|        | Duplication, 3,624,082-3,767,566 | <i>rhsB</i> to <i>rhsA</i>                                               |
| JME6   | IS5 insertion                    | Between promoter and RBS of <i>pcaH</i><br>See Supplementary Figure 1    |
|        | Duplication, 2,065,704-2,105,550 | <i>flu</i> at 2,071,645-2,074,769<br>IS5 flanks each side of duplication |
|        | Deletion, 2,072,681-2,072,941    | In-frame 261 bp deletion in both copies of <i>flu</i>                    |
|        | Duplication, 3,624,082-3,767,566 | <i>rhsB</i> to <i>rhsA</i>                                               |
|        | Deletion, 3,816,442              | Intergenic                                                               |

Supplementary Table 2: Expression of Ag43 in evolved isolates.

| Strain | Relative expression |
|--------|---------------------|
| AG978  | $1.0 \pm 0.1$       |
| JME1   | $110. \pm 10.$      |
| JME4   | $65 \pm 9$          |
| JME6   | $190. \pm 3$        |
| JME17  | $2.4 \pm 1.1$       |

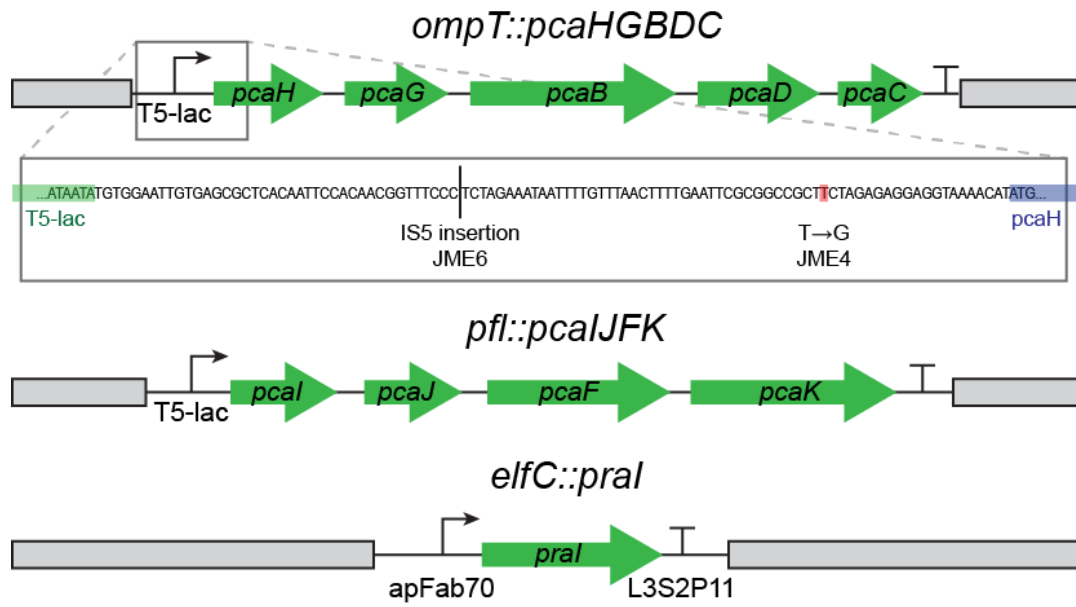

Supplementary Figure 1: Construct design. The eight-gene pathway for ortho PCA degradation, along with the PCA transporter *pcaK* was designed as two operons, each expressed from a T5-lac promoter. These operons were integrated into the indicated chromosomal loci in AG978. The mutations to the *ompT::pcaHGBDC* operon found in JME4 and JME6 are indicated. A separate expression construct for the 4-hydroxybenzoate 3-monooxygenase *pral* was inserted into the *elfC* locus in strains JME7 and JME50.

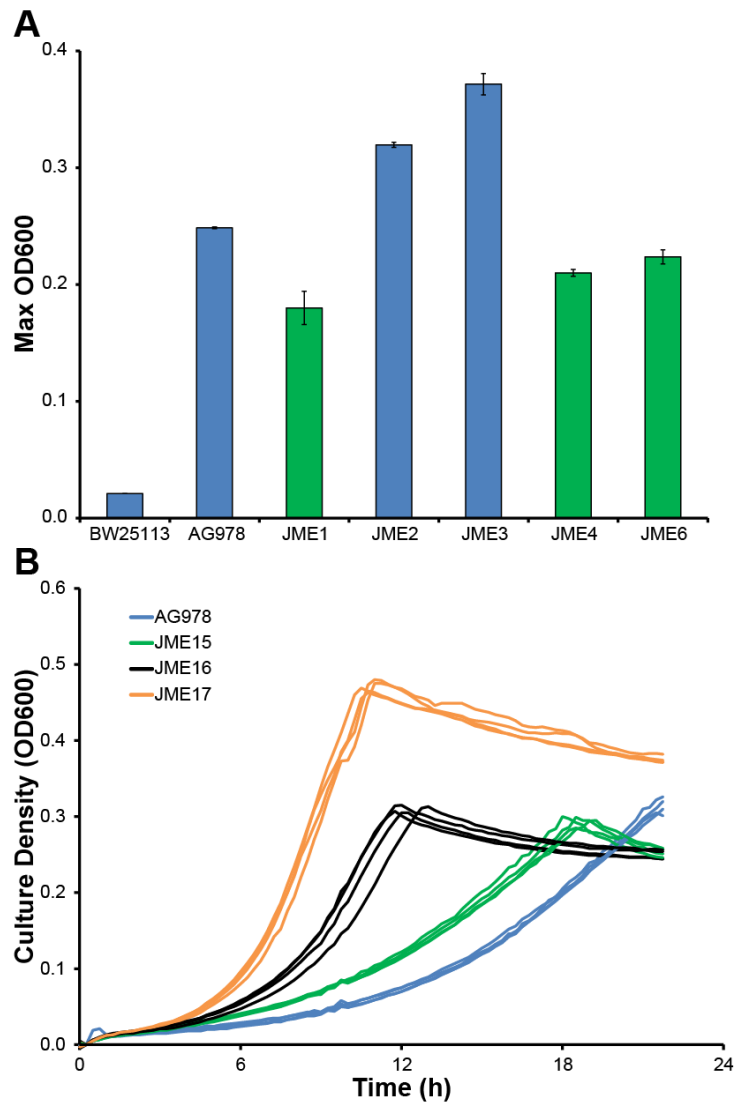

Supplementary Figure 2: Mutations to *flu* decrease maximum optical density. (A) During growth with PCA, the maximum OD600 varies between strains with wildtype *flu* (in blue) and mutant forms of *flu* (in green). Cultures containing the parental strain AG978 turn a darker red color, indicating that more of the substrate has oxidized, which likely accounts for the intermediate yield of this strain. Error bars show one standard deviation, calculated from three biological replicates. (B) A 261-bp deletion in *flu* was introduced into AG978 and JME17, producing strains JME15 and JME16, respectively. Strains were grown in minimal medium containing 1 g/L PCA as the sole source of carbon and energy.

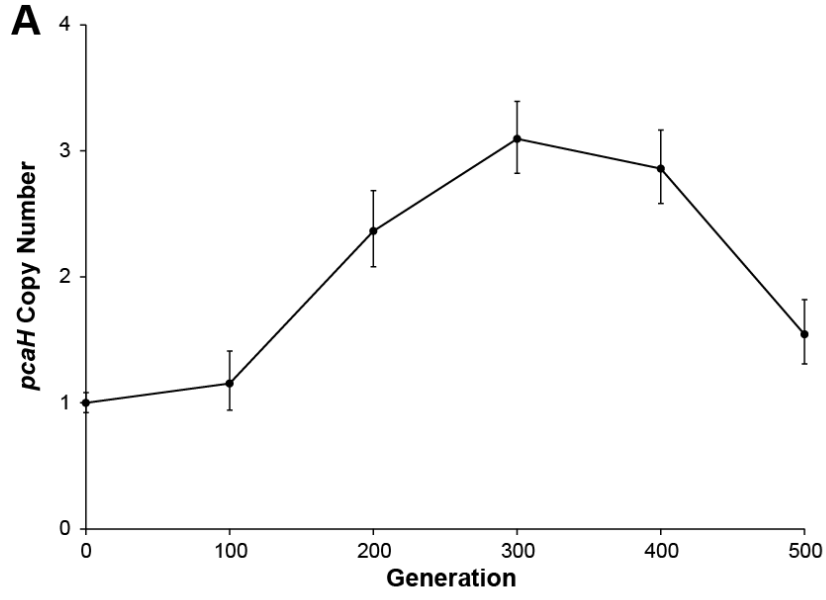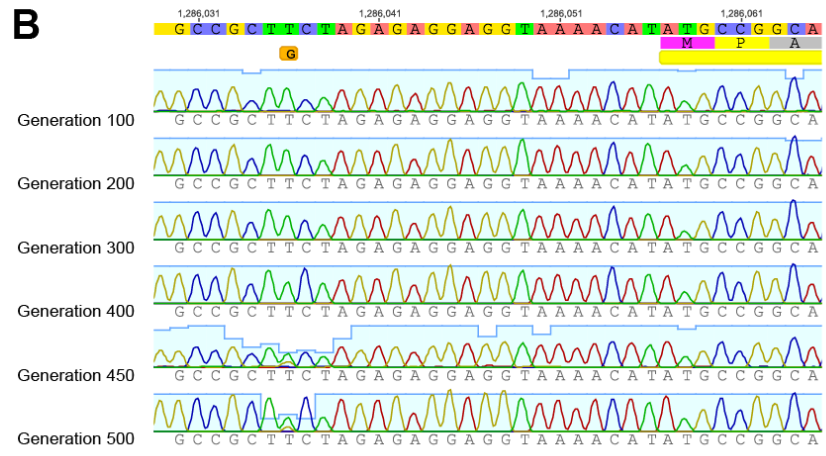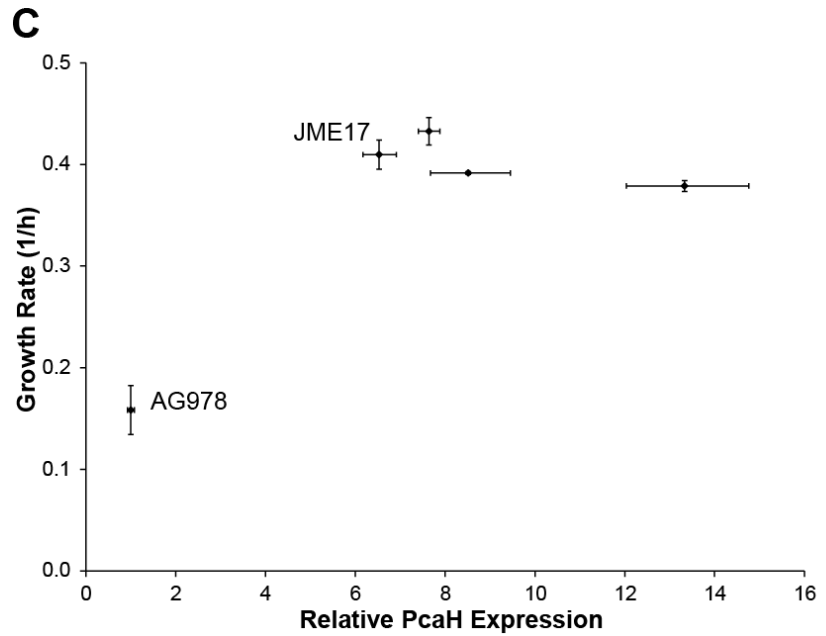

Supplementary Figure 3: A two-fold increase in RBS strength is the dominant strategy for PcaH overexpression. (A) As measured by qPCR, the population averaged *pcaH* copy number increases in replicate population B. Error bars show one standard deviation, calculated from three biological replicates. The curve is a guide for the eye. (B) The RBS mutation, a T->G substitution, is first detected as a mixed base in generation 450. (C) The RBS mutation, reconstructed in JME17, increases PcaH expression by 7-fold relative to the parent, AG978. Engineered mutants with further increases in predicted RBS strength do not lead to a corresponding increase in growth rate. Error bars show one standard deviation, calculated from three biological replicates. Note that, in some cases, the error bars are difficult to visually distinguish from the data points.
